# Supplementary material for: Motivierende Gesprächsführung mit Simulationspatient_innen lehren und prüfen
Source: Atypon-hosted journal article supplement (doi:10.1026/1616-3443/a000637), 2021-07-01

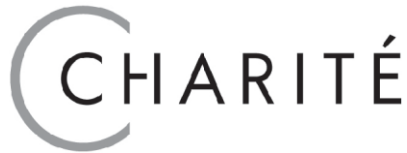

## Simulationspersonenprogramm

### Rollenskript

397\_Brehm

KIT 4. Semester

### Informationen für Studierende, Simulationspersonen (SP) und Dozierende:

#### **Fall / Diagnose:**

|                         |                                                                      |
|-------------------------|----------------------------------------------------------------------|
| Nikotinentwöhnung       |                                                                      |
| Untersuchung gefordert? | Ja <input type="checkbox"/> Nein <input checked="" type="checkbox"/> |

#### **Ort der Konsultation:**

|                      |
|----------------------|
| Hausärztliche Praxis |
|----------------------|

#### **Rolle der interviewenden Person:**

|                                |   |
|--------------------------------|---|
| Student*in                     |   |
| Student*in im Praktischen Jahr |   |
| Ärztin*Arzt                    | X |

#### **Interview-Typ:**

|                                                                            |
|----------------------------------------------------------------------------|
| Eine seit 30 Jahren in der Hausarztpraxis bekannte Patientin (Frau Brehm). |
|----------------------------------------------------------------------------|

#### **Vorabinformationen über die Situation:**

|                                                                                                                                                                                                                                                                                                                                                                                                                                                                                                         |
|---------------------------------------------------------------------------------------------------------------------------------------------------------------------------------------------------------------------------------------------------------------------------------------------------------------------------------------------------------------------------------------------------------------------------------------------------------------------------------------------------------|
| Frau Brehm ist in der Hausarztpraxis bekannt. Bis auf eine depressive Episode vor fünf Jahren und eine allergische Konjunktivitis (Bindehautentzündung) auf Frühblüher, die erfolgreich mittels Hyposensibilisierung vor drei Jahren behandelt worden war, sind keine Erkrankungen bekannt. Sie raucht seit ca. 30 Jahren ungefähr eine Schachtel Zigaretten/Tag. Frau Brehm hat sich für heute einen Termin geben lassen, um über ihr Rauchverhalten und mögliche Reduktionsmöglichkeiten zu sprechen. |
|---------------------------------------------------------------------------------------------------------------------------------------------------------------------------------------------------------------------------------------------------------------------------------------------------------------------------------------------------------------------------------------------------------------------------------------------------------------------------------------------------------|

#### **Aufgabenstellung:**

|                                                                                                                                                                     |
|---------------------------------------------------------------------------------------------------------------------------------------------------------------------|
| Fördern Sie die Motivation der Patientin, mit dem Rauchen aufzuhören. Verwenden Sie dafür Techniken der Motivierenden Gesprächsführung (Rollnick und Miller, 2015). |
|---------------------------------------------------------------------------------------------------------------------------------------------------------------------|

#### **Lernziel(e):**

|                                                                                                                                                                                                                                                                                                         |
|---------------------------------------------------------------------------------------------------------------------------------------------------------------------------------------------------------------------------------------------------------------------------------------------------------|
| Die Studierenden sollen: <ul style="list-style-type: none"><li>• Techniken der Motivierenden Gesprächsführung (Rollnick und Miller) anwenden können (i.S. der vier grundlegenden Prinzipien: Empathie, Diskrepanz erzeugen, Umgang mit Sustain Talk und Dissonanz, Selbstwirksamkeit stärken)</li></ul> |
|---------------------------------------------------------------------------------------------------------------------------------------------------------------------------------------------------------------------------------------------------------------------------------------------------------|

**Wichtig für die Interviewenden:**

- Die genauen Lebensumstände der Patientin bzw. die Umstände des Rauchens (Wann? Seit wann? Wie oft?) sowie den Wunsch, aufzuhören, erfragen.
- Die Patientin dazu veranlassen, die Vor- und Nachteile des Rauchens in Bezug auf ihre Lebensziele und Werte zu benennen und gegeneinander aufzuwiegen.
- Zu erfragen, welche Erwartungen und Hoffnungen die Patientin mit dem Aufhören verbindet.
- Ressourcen der Patientin erfragen sowie ihr Unterstützung anbieten.
- Die Patientin in der Überzeugung bestärken, durch eigenes kompetentes Verhalten mit dem Rauchen aufzuhören.

**Informationen für SP und Dozierende:**

Fiktiver Patient\*innenname:

Karen Brehm

Mögliches Alter:

45-60

Geschlecht:

weiblich

Gewicht:

egal

Äußere Erscheinung:

gepflegt, lackierte Nägel, Hautbild eher biologisch älter

Sozialer Status/Ausbildung:

(Chef-)Sekretärin

Muttersprache:

deutsch

Persönlichkeitsmerkmale:

ist sicher in den Umgangsformen, legt Wert auf ihr Äußeres, kann sich sachlich gut ausdrücken, antwortet exakt auf die gestellten Fragen, wirkt leicht distanziert

**Krankengeschichte / Medizinische Informationen:**

Hauptbeschwerde (kurz und in den Worten der Patientin):

„Ich schaffe es einfach nicht, mit dem Rauchen aufzuhören.“

#### Eigenanamnese:

|                                                                                                                                                                                                                                                                                                                           |
|---------------------------------------------------------------------------------------------------------------------------------------------------------------------------------------------------------------------------------------------------------------------------------------------------------------------------|
| <ul style="list-style-type: none"> <li>- allergische Konjunktivitis (Bindehautentzündung) auf Frühblüher – mittels Hyposensibilisierung ausreichend behandelt</li> <li>- depressive Episode nach dem Tod der Mutter vor fünf Jahren (medikamentös behandelt, für drei Monate, Namen des Medikaments vergessen)</li> </ul> |
|---------------------------------------------------------------------------------------------------------------------------------------------------------------------------------------------------------------------------------------------------------------------------------------------------------------------------|

#### Lebensgewohnheiten:

|                  | Substanzen                                                                                                                                                    | Menge?                                                       | Seit wann? |
|------------------|---------------------------------------------------------------------------------------------------------------------------------------------------------------|--------------------------------------------------------------|------------|
| Alkohol          | Wein, Sekt, Likör                                                                                                                                             | kleine Mengen zu gesellschaftlichen Anlässen                 |            |
| Nikotin          | Zigaretten                                                                                                                                                    | 20/Tag (Gauloises, am Morgen zum Kaffee die erste Zigarette) | 30 Jahre   |
| Sonst. Drogen    | keine                                                                                                                                                         |                                                              |            |
| Medikamente      | keine                                                                                                                                                         |                                                              |            |
| Ernährung        | Frühstück: Kaffee & Zigarette (sonst nichts), zum Mittagessen nimmt sie sich Brote von zuhause mit oder kauft sich etwas beim Bäcker, abends kocht sie meist. |                                                              |            |
| Sport & Bewegung | Im Alltag oft zu Fuß unterwegs, geht auch gerne spazieren, sonst keine sportliche Aktivität; im Urlaub wandert sie gelegentlich (leichte Wanderungen).        |                                                              |            |

#### Sozialanamnese:

|                                                                                                                                                                                                                                                                                                                                                                                                                                                                                                                                                                                                                                                                                                                                                                                                                                                                                                                                                                                                                                                                                                                                                                                                                                                                                                                                                                                                                                                                                                                                                                                                                                                                                                                                                                                                                                                                                                  |
|--------------------------------------------------------------------------------------------------------------------------------------------------------------------------------------------------------------------------------------------------------------------------------------------------------------------------------------------------------------------------------------------------------------------------------------------------------------------------------------------------------------------------------------------------------------------------------------------------------------------------------------------------------------------------------------------------------------------------------------------------------------------------------------------------------------------------------------------------------------------------------------------------------------------------------------------------------------------------------------------------------------------------------------------------------------------------------------------------------------------------------------------------------------------------------------------------------------------------------------------------------------------------------------------------------------------------------------------------------------------------------------------------------------------------------------------------------------------------------------------------------------------------------------------------------------------------------------------------------------------------------------------------------------------------------------------------------------------------------------------------------------------------------------------------------------------------------------------------------------------------------------------------|
| <p>Patientin hat einen erwachsenen Sohn (ca. 25-30 Jahre alt – je nach Alter von Frau Brehm anpassen) und ist Chefsekretärin in einem mittelständischen Transportunternehmen/ Anwaltskanzlei.</p> <p>Im Laufe ihres Lebens war sie in verschiedenen Partnerschaften, in ihrer Jugend und im jungen Erwachsenenalter immer mit Männern. Mit dem Vater ihres Sohnes war sie insgesamt 10 Jahre zusammen, dann erfolgte die Trennung – sie und ihr Partner waren nicht mehr glücklich in der Beziehung. Frau Brehm hatte außerdem bemerkt, dass sie sich auch für Frauen interessiert. Sie war davon zunächst verwirrt, aber auch neugierig, und traute sich nach der Trennung, dem Impuls nachzugehen. Es folgte eine 5-jährige Beziehung mit einer Frau. Danach war sie einige Jahre Single. Vor ihrer Familie und Freund*innen hat sie ihre gleichgeschlechtlichen Beziehungen zu Beginn geheim gehalten und sich dann Stück für Stück geoutet. Für die Eltern und den Sohn war das zunächst schwer zu verstehen, mittlerweile haben sie Verständnis für ihre Lebensweise entwickelt. Bei der Arbeit thematisiert sie ihre sexuelle Orientierung nicht.</p> <p>Vor ca. einem Jahr hat sie sich auf einer Dating-Plattform angemeldet (OkCupid). Seit zwei Monaten ist sie in einer neuen Beziehung mit einer Frau (Juliane), die sie dort kennen gelernt hat. Sie teilen die Lust zu reisen sowie ihre Liebe zu Tieren. Juliane wohnt ebenfalls in Berlin.</p> <p>Wichtig: Die sexuelle Orientierung der Patientin soll in diesem Gespräch nicht im Vordergrund stehen. Frau Brehm hat kein Problem, dem Arzt*der Ärztin von ihrer lesbischen Beziehung zu erzählen und beantwortet auch Fragen hierzu, aber wenn Studierende zu sehr vom Thema abweichen, bitte abblocken: „Was hat das denn damit zu tun, warum ich hier bin? Ich will Ihre Unterstützung, um mit dem Rauchen aufzuhören!“</p> |
|--------------------------------------------------------------------------------------------------------------------------------------------------------------------------------------------------------------------------------------------------------------------------------------------------------------------------------------------------------------------------------------------------------------------------------------------------------------------------------------------------------------------------------------------------------------------------------------------------------------------------------------------------------------------------------------------------------------------------------------------------------------------------------------------------------------------------------------------------------------------------------------------------------------------------------------------------------------------------------------------------------------------------------------------------------------------------------------------------------------------------------------------------------------------------------------------------------------------------------------------------------------------------------------------------------------------------------------------------------------------------------------------------------------------------------------------------------------------------------------------------------------------------------------------------------------------------------------------------------------------------------------------------------------------------------------------------------------------------------------------------------------------------------------------------------------------------------------------------------------------------------------------------|

Relevante Familienanamnese:

Vater gesund (80 Jahre, raucht gelegentlich Pfeife), Mutter vor fünf Jahren an Lungenkrebs innerhalb von drei Monaten gestorben - Mutter hatte zwei Schachteln am Tag geraucht.

Nikotinanamnese:

|                           |                                                                                                                                                                                                                                                                                                                                                                                                                                                                                                                                                                                                                                                                                                                                                                                                                                                                                                                                                                                                                                                                                                                                                                                                                                                                                                                                                                                              |
|---------------------------|----------------------------------------------------------------------------------------------------------------------------------------------------------------------------------------------------------------------------------------------------------------------------------------------------------------------------------------------------------------------------------------------------------------------------------------------------------------------------------------------------------------------------------------------------------------------------------------------------------------------------------------------------------------------------------------------------------------------------------------------------------------------------------------------------------------------------------------------------------------------------------------------------------------------------------------------------------------------------------------------------------------------------------------------------------------------------------------------------------------------------------------------------------------------------------------------------------------------------------------------------------------------------------------------------------------------------------------------------------------------------------------------|
| Menge                     | 1 Schachtel/Tag (ca. 20 Zigaretten)                                                                                                                                                                                                                                                                                                                                                                                                                                                                                                                                                                                                                                                                                                                                                                                                                                                                                                                                                                                                                                                                                                                                                                                                                                                                                                                                                          |
| Lieblingszigarette        | die Zigarette zum Kaffee                                                                                                                                                                                                                                                                                                                                                                                                                                                                                                                                                                                                                                                                                                                                                                                                                                                                                                                                                                                                                                                                                                                                                                                                                                                                                                                                                                     |
| Beschwerden               | hat abends häufig ekligen Geschmack im Mund, hustet morgens leicht ab                                                                                                                                                                                                                                                                                                                                                                                                                                                                                                                                                                                                                                                                                                                                                                                                                                                                                                                                                                                                                                                                                                                                                                                                                                                                                                                        |
| Umfeld                    | viele ihrer Freund*innen rauchen, es wäre schrecklich schwierig, nicht mit ihnen zu rauchen                                                                                                                                                                                                                                                                                                                                                                                                                                                                                                                                                                                                                                                                                                                                                                                                                                                                                                                                                                                                                                                                                                                                                                                                                                                                                                  |
| Sorgen und Ängste         | Gewichtszunahme;<br>Angst, wie die Mutter an Lungenkrebs zu sterben;<br>Wunsch, der neuen Partnerin (Nichtraucherin) zu gefallen                                                                                                                                                                                                                                                                                                                                                                                                                                                                                                                                                                                                                                                                                                                                                                                                                                                                                                                                                                                                                                                                                                                                                                                                                                                             |
| Bisheriges Rauchverhalten | <p>Sie raucht die ersten zwei Zigaretten morgens zu Kaffee und Zeitung. Sie kombiniert die Pausen bei der Arbeit stets mit einer Zigarette, manchmal auch zwei, früher im Büro selbst, jetzt vor der Tür, meistens wiederum zusammen mit einem Kaffee. Das bedeutet für sie ein kurzes Abschalten und Herunterkommen von der Arbeit, gerade wenn es stressig wird. Nach der Mittagspause bzw. nach dem Essen raucht sie am liebsten („Verdauungszigarette“). Wenn die Müdigkeit bei der Arbeit kommt, raucht sie zwischendurch auch, um sich besser zu konzentrieren. Zu Hause raucht sie gern, weil sie das Ritual des Feierabends schätzt, und beim Ausgehen, bei gesellschaftlichen Anlässen, zu Alkohol, weil es für sie irgendwie dazugehört, auch wenn immer weniger Leute rauchen.</p> <p>Die neue Partnerin ist Nichtraucherin und würde sich wünschen, dass auch Frau Brehm aufhört oder zumindest weniger raucht. Wenn die beiden sich sehen, versucht sie diese Zeit ohne Zigaretten auszuhalten. Dies gelingt ihr normalerweise, auch wenn sie dann gegen Ende der Treffen zunehmend nervös wird und danach umso mehr raucht. Wenn sie länger Zeit miteinander verbringen, sie z.B. bei ihr übernachtet, muss sie sich irgendwann aber „rausschleichen“, um zu rauchen. Wenn Juliane das mitbekommt, reagiert sie latent genervt, die beiden streiten jedoch nicht deswegen.</p> |

**Eröffnung des Interviews:** (damit beginnt die SP immer das Gespräch):

„Ich bin nochmal ins Nachdenken gekommen über das Rauchen und würde das gerne nochmal anpacken. Ich weiß nur einfach nicht, wie ich das schaffen kann.“

Anlass für den heutigen ärztlichen Besuch:

Immer wieder hat Frau Brehm in der Vergangenheit versucht, mit dem Rauchen aufzuhören. Auch in ihrem Umfeld, z.B. unter den Kolleg\*innen ist die Anzahl der Raucher\*innen immer kleiner geworden, das Gesundheitsbewusstsein steigt und sie würde sich gerne anschließen. Seit sie mit Juliane in einer Beziehung ist, beschäftigt sie das Thema aktuell wieder sehr stark. Juliane weiß, dass Frau Brehm raucht und akzeptiert dies, würde es sich aber anders wünschen und hat dies auch klar geäußert.

Frau Brehm ist sehr verliebt in ihre neue Partnerin und möchte die Beziehung nicht wegen des Rauchens aufs Spiel setzen. Wenn sie auf diesen Grund angesprochen wird, druckst sie herum und will nicht mit der Sprache heraus.

Hat bereits drei Versuche in den letzten 15 Jahren unternommen, selbstständig mit dem Rauchen aufzuhören, diese scheiterten nach ein paar (drei bis fünf) Tagen. Deshalb erhofft sie sich jetzt Unterstützung.

Erwartungen an die\*den Ärztin\*Arzt und emotionale Situation:

Frau Brehm wünscht sich Beratung und Unterstützung durch die\*den Hausärzt\*in, außerdem auch Verständnis für ihre Situation.

Typische Äußerungen oder Fragen (aus Sicht der motivierenden Gesprächsführung ist dies auch möglicher „Sustain Talk“):

- „Ich kann mir nicht vorstellen damit aufzuhören, es ist ein Teil von mir.“
- „Ich hatte ja bisher keine großen Probleme deswegen.“
- „Außerdem möchte ich auf keinen Fall zunehmen.“
- „Ich glaube, dass ich das nicht schaffe – sonst schaffe ich immer alle Probleme, aber mein Laster ist einfach zu stark.“
- „Eigentlich rauche ich gern – dabei kann man so tolle Gespräche führen.“

Körperhaltung und Körpersprache:

Sitzt aufrecht, übergeschlagene Beine, offener Blick – während des Gespräches kommen Selbstzweifel, dabei sinkt sie ein wenig in sich zusammen. Wird unruhig, wenn es ihr unangenehm wird.

Schwierigkeiten im Gespräch/beim Untersuchen:

Frau Brehm geht in Dissonanz mit dem\*der Interviewenden, wenn diese\*r sehr konfrontativ vorgeht („...wenn Sie so weiterrauchen, enden Sie wie Ihre Mutter“) oder die Änderung des Rauchverhaltens als gar nicht so schwer dargestellt wird („Sie müssen es nur wollen.“)  
→ wenn Wahlfreiheit fehlt

**Formen der Dissonanz:**

- Die\*den Ärztin\*Arzt unterbrechen
- Die Autorität des\*der Ärztin\*Arzt in Frage stellen („Wissen Sie eigentlich, wie es ist, wenn man 30 Jahre lang geraucht hat?“)
- Negieren, bagatellisieren („So viel rauche ich doch gar nicht.“)
- Aus dem Gespräch aussteigen („Können sie mir nicht einfach was verschreiben?“)

Diese Daten werden von der SP nur bei expliziter Nachfrage erwähnt:

Große Probleme beim Verarbeiten des Todes der Mutter – trotz Wissen um das Rauchen als Ursache des Lungenkrebs hat sie in der Depression selbst wieder angefangen.

Diese Dinge erzählt die SP nur, wenn eine angemessene Atmosphäre während des Gesprächs vorhanden ist:

Während der Schwangerschaft mit ihrem Sohn und der Stillzeit hat Frau Brehm nicht geraucht. Danach gab es in den letzten 15 Jahren bereits drei Versuche, selbstständig mit dem Rauchen aufzuhören. Diese scheiterten jeweils nach ein paar (drei bis fünf) Tagen:

1. Anlass - vor 15 Jahren: Der Sohn wollte es und gute Vorsätze für das neue Jahr (nach drei Tagen wieder angefangen)
2. Anlass - ein halbes Jahr später, weil der erste Versuch nicht geklappt hat: Eine Freundin hatte es mit Akupunktur geschafft, sodass sie diese ebenfalls ausprobierte, allerdings erfolglos (nach drei Tagen wieder angefangen)
3. Anlass: Erkrankung der Mutter an Lungenkrebs vor fünf Jahren – im Rahmen der anschließend manifesten Depression hatte sie nach fünf Tagen wieder mit dem Rauchen angefangen.

Wichtige Feedback-Aspekte für SP:

- Hat die\*der Studierende sich Zeit genommen, sich ein Bild meiner Lebenssituation zu machen, um mein Anliegen zu verstehen?
- Ist mir der Konflikt (Was spricht für das Rauchen, was dagegen?) klar(er) / bewusst(er) geworden?
- Wurde ich in meiner Zuversicht bestärkt, mit dem Rauchen aufzuhören?

CHARITÉ - UNIVERSITÄTSMEDIZIN BERLIN  
Prodekanat für Lehre  
Team Spezielle Lehrformate  
Simulationspersonenprogramm  
Charitéplatz 1, 10117 Berlin

E-Mail: [sp-programm@charite.de](mailto:sp-programm@charite.de)

## Zusatzmaterial:

### Pro-Contra Liste Rauchen

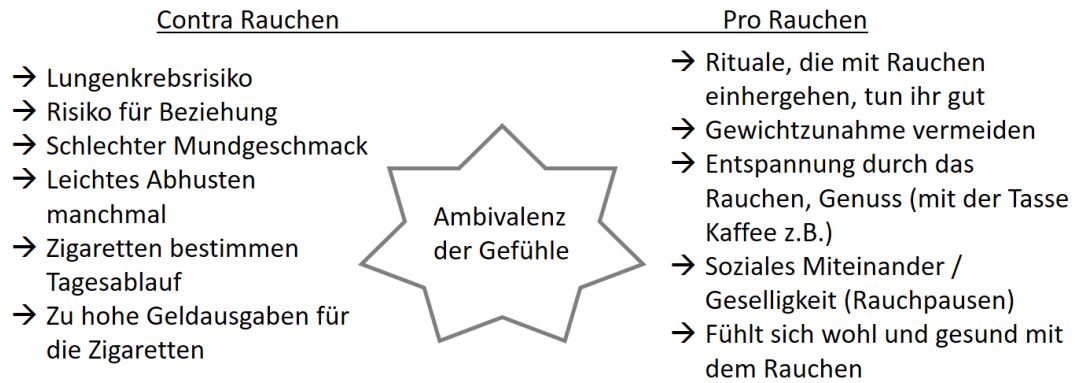

### Erwartung an den Arzt / die Ärztin

Verständnis, Empathie, Motivation, Hilfe, nicht verurteilt werden, Unterstützung, Wertschätzung („Sie haben es geschafft, in der Schwangerschaft nicht zu rauchen!“) Kommunikation über das Problem, mal in Ruhe darüber Nachdenken können, was sie eigentlich genau will und wo die Widersprüchlichkeiten in ihr liegen.

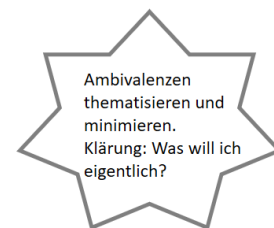

Supplement: 1616-3443_a000637_esm1.pdf [file 1616-3443_a000637_esm1.pdf]
